# Supplementary material for: Time-Resolved Transcriptome Analysis of Bacillus subtilis Responding to Valine, Glutamate, and Glutamine
Source: PLoS One. 2009 Sep 18;4(9):e7073. doi: 10.1371/journal.pone.0007073 (PMC2743287; doi:10.1371/journal.pone.0007073)
Supplement: Table S4 — T-values of Gene Groups using Transcript Regulators Model. The expression values of all genes after amino acid treatments (Dataset S1) were performed with transcript regulators model for T-profiler analysis in-line (http://www.science.uva.nl/boorsma/t-profiler-bacillusnew/). T-value, E-value (>0.05), Mean, and ORFs are listed. (0.04 MB XLS) [file pone.0007073.s009.xls]

## Sheet: Table S4
Table S4 The T-values of gene groups regulated by transcript regulators and Sigma factors
Name	T1				T2				T3				T4
	t-value	E-value	Mean	ORFs	t-value	E-value	Mean	ORFs	t-value	E-value	Mean	ORFs	t-value	E-value	Mean	ORFs
Val Pulse-TF
StrCon_Negative	12.47	1e-15	1.038	82	11.24	1e-15	1.197	85	8.59	1e-15	0.763	86
PurR_Negative	9.22	1e-15	1.401	27	4.34	0.0196	0.805	30
MtrB_Positive	-13.12	1e-15	-3.804	9	-6.29	4.41e-07	-2.415	9					-5.09	0.000497	-1.346	10
YrzC_Negative	6.26	5.35e-07	1.445	13	5.32	0.000144	1.596	13
CodY_Negative	-6.16	1.01e-06	-0.753	44	-5.09	0.000497	-0.828	42
StrCon_Positive	-5.84	7.25e-06	-0.632	56	-6.05	2.01e-06	-0.838	57
CcpA_Positive	-5.01	0.000756	-1.394	10	-6.5	1.12e-07	-2.333	10
BkdR_Positive	4.8	0.0022	1.651	7	5.02	0.000718	1.285	17	5.05	0.000614	1.911	7
YvrH_Positive	4.48	0.0103	0.912	16					4.85	0.00171	1.045	17
Spo0A_Positive					4.79	0.00231	0.943	27
Fur_Negative									5.6	2.98e-05	0.805	35	6.81	1.36e-08	0.828	35
TnrA_Negative									4.38	0.0163	0.722	27
SpoVT_Negative									-4.17	0.0414	-0.899	19
GerE_Positive													-11.36	1e-15	-2.08	18
TnrA_Positive													-6.45	1.55e-07	-0.814	38
SpoIIID_Negative													4.33	0.0205	0.472	41
SigK	-7.2	8.36e-10	-0.607	90	-6.54	8.55e-08	-0.715	90	-9.07	1e-15	-0.843	91	-17.79	1e-15	-1.358	90
SigB	-5.5	5.28e-05	-0.452	97	-19.14	1e-15	-1.902	97	-20.04	1e-15	-1.702	97	-17.36	1e-15	-1.285	96
SigG	-6.66	3.8e-08	-0.58	85	-6.39	2.3e-07	-0.72	85	-7.61	3.81e-11	-0.739	85
SigE	-5.04	0.000646	-0.339	146	-4.17	0.0414	-0.366	146	-9.68	1e-15	-0.706	146
SigH	-4.15	0.0451	-0.616	31
SigW					9.04	1e-15	1.141	62	6.92	6.27e-09	0.743	60
SigF									-6.68	3.32e-08	-0.956	40
SigD													-15.62	1e-15	-1.324	75
Glu Pulse-TF
PurR_Negative	14.69	1e-15	1.941	30
Hpr_Negative	-5.19	0.000292	-1.032	14
TnrA_Positive	-4.98	0.000883	-0.575	36	-5.16	0.000343	-0.766	36	-5.21	0.000262	-0.859	37
PhoP_Positive	4.64	0.00483	0.658	29	8.64	1e-15	1.449	29	7.05	2.49e-09	1.325	29
YrzC_Negative					9.44	1e-15	2.477	13
StrCon_Negative					5.51	4.98e-05	0.518	89	5.11	0.000447	0.533	89
Fur_Negative					-5.29	0.00017	-0.796	35
MtrB_Positive					-4.62	0.00532	-1.423	10
StrCon_Positive									-4.38	0.0163	-0.574	57
SinR_Negative													5.94	3.96e-06	1.602	20
ComA_Positive													-5.01	0.000756	-1.281	20
DegU_Positive													-4.59	0.00614	-0.869	34
YvrH_Positive													4.29	0.0245	1.276	17
SigB	-9.02	1e-15	-0.615	97	-13.76	1e-15	-1.198	96	-20.73	1e-15	-1.965	97	10.11	1e-15	1.188	95
SigW	-6.88	8.31e-09	-0.595	62	-7.03	2.87e-09	-0.78	62	-6.86	9.56e-09	-0.86	62
SigH					-6.15	1.08e-06	-0.988	31	-4.44	0.0124	-0.806	31
SigD									4.49	0.00984	0.513	75	14.1	1e-15	1.844	74
SigA													5.74	1.31e-05	0.271	640
Gln Pulse-TF
PurR_Negative	11.18	1e-15	1.255	31	7.97	2.16e-12	1.677	30	-6.27	5.01e-07	-1.015	31
TnrA_Positive	-14.27	1e-15	-1.391	37	-11.08	1e-15	-2.1	37	-12.09	1e-15	-1.739	38
KipR_Negative	-7	3.55e-09	-1.855	7	-5.6	2.98e-05	-2.847	7	-6.52	9.77e-08	-2.563	7
GlnR_Negative	-6.43	1.77e-07	-1.261	11	-5.71	1.57e-05	-2.164	11	-5.76	1.17e-05	-1.685	11
ResD_Positive	5.11	0.000447	0.615	29
SinR_Negative	4.59	0.00614	0.658	21
FNR_Positive	4.49	0.00984	1.047	9
CcpA_Positive	4.13	0.0491	1.041	8
YrzC_Negative					9.13	1e-15	3.075	13
CodY_Negative					-8.99	1e-15	-1.584	43
AbrB_Negative					-6.73	2.36e-08	-0.995	61	-4.92	0.0012	-0.558	60
MtrB_Positive					-6.65	4.07e-08	-2.666	10
StrCon_Positive					-6.12	1.3e-06	-0.949	56
StrCon_Negative					5.46	6.61e-05	0.649	87					-5.02	0.000718	-0.765	88
SpoIIID_Negative									-7.17	1.04e-09	-0.986	42	-6.59	6.11e-08	-1.398	42
Xpf_Positive									-4.56	0.00708	-1.417	10
ComK_Positive													-6.63	4.66e-08	-1.22	56
SpoVT_Positive													-6.54	8.55e-08	-2.7	12
DegU_Positive													-5.88	5.7e-06	-1.399	34
GerE_Negative													-4.93	0.00114	-2.638	8
GerE_Positive													-11.17	1e-15	-3.473	19
SigK	-5.89	5.36e-06	-0.347	91	-5.45	7e-05	-0.66	91	-4.49	0.00984	-0.408	91	-19.7	< 1.0e-15	-2.639	88
SigB	-4.15	0.0451	-0.23	96	-14.2	1e-15	-1.609	97	-16.67	1e-15	-1.441	97	17.48	1e-15	2.123	94
SigE	-4.26	0.028	-0.185	146					-9.72	1e-15	-0.688	146	-13.66	1e-15	-1.491	143
SigW					-6.67	3.55e-08	-0.98	62	-5.83	7.7e-06	-0.651	62
SigH					-5.72	1.48e-05	-1.21	31	-4.35	0.0187	-0.703	31
SigD									5.8	9.21e-06	0.602	75
SigF									-4.79	0.00231	-0.676	40	-4.3	0.0234	-0.968	40
SigG													-9.01	1e-15	-1.318	85
